# Supplementary material
Source: PubMed Central journal article supplement (PMC9597525)
Supplement: mmc1.pdf [file mmc1.pdf]

# Supplementary Information: The resurgence risk of COVID-19 in the presence of immunity waning and ADE effect: a mathematical modelling study

Weike Zhou<sup>a,1</sup>, Biao Tang<sup>b,1</sup>, Yao Bai<sup>c,1</sup>, Yiming Shao<sup>d,e</sup>, Yanni Xiao<sup>b,\*</sup>, Sanyi Tang<sup>a,\*</sup>

<sup>a</sup>*School of Mathematics and Statistics, Shaanxi Normal University, Xi'an, 710119, P.R. China*

<sup>b</sup>*School of Mathematics and Statistics, Xi'an Jiaotong University, Xi'an, 710049, P.R. China*

<sup>c</sup>*Department of Infection Disease Control and Prevention, Xi'an Center for Disease Prevention and Control, Xi'an, 710043, P.R. China*

<sup>d</sup>*State Key Laboratory for Infectious Disease Prevention and Control, National Center for AIDS/STD Control and Prevention, Chinese Center for Disease Control and Prevention, Beijing, 102206, P.R. China*

<sup>e</sup>*Collaborative Innovation Center for Diagnosis and Treatment of Infectious Diseases, Hangzhou, 310058, P.R. China*

---

## S1. Full structure model

The full modelling framework includes the infection and transmission dynamic of COVID-19 and the two-doses vaccination program and immunity waning dynamic.

**Transmission progression:** We used an *SEIAHR* model structure to describe the transmission dynamics of COVID-19. That is, according to the epidemic status of COVID-19 infections, the total population is divided into susceptible ( $S$ ), exposed ( $E$ ), symptomatic infected ( $I$ ), asymptomatic infected ( $A$ ), hospitalized ( $H$ ), recovered ( $R$ ) classes [1–4]. The susceptible population will enter into the exposed class ( $E$ ) once they are infected by symptomatic or asymptomatic infected population. The exposed individuals move to  $I$  or  $A$  at a rate of  $\sigma$ . And we assume that the probability of showing symptoms is  $\rho$ . The recovery rates of  $I$  and  $A$  are set to be  $\gamma_I$  and  $\gamma_A$ , respectively. Given the immunity waning, the recovered population can become susceptible again. The transmission diagram with the mass vaccination program is shown in Fig. 1 in the main text.

**Vaccination program for susceptible population:** Susceptible population ( $S$ ), will be firstly vaccinated by one-dose at a rate  $v_1$ . The effective protection rate by one-dose is  $p_1$ , hence, the part  $p_1 v_1$  can be effectively protected and temporarily immune to COVID-19, and the class

---

\*Corresponding author

*Email addresses:* yxiao@mail.xjtu.edu.cn (Yanni Xiao), sytang@snnu.edu.cn (Sanyi Tang)

<sup>1</sup>Equal Contributor

29 is denoted by  $V_1$ . The rest part  $((1 - p_1)v_1)$  remains in the susceptible class, which is denoted  
 30 by  $S_{V_1}$ . The population vaccinated by one-dose will be further vaccinated by a second dose after  
 31 a pre-set period since the first dose. Similarly, we set a protection rate of the second dose as  $p_2$ .  
 32 Once vaccinated by the second dose, individuals will either move to the class effectively pro-  
 33 tected (denoted by  $V_2$ ), or to the class susceptible to COVID-19 (denoted by  $S_{V_2}$ ). We assume  
 34 that the population effectively protected by one-dose (the persons in  $V_1$ ), will all move to  $V_2$   
 35 when they receive the second dose. It should be mentioned that the population vaccinated but  
 36 not immune to COVID-19 ( $S_{V_1}, S_{V_2}$ ) can be infected. Then according to the epidemic status, we  
 37 further have the classes of  $E_j, I_j, A_j, R_j, j \in \{V_1, V_2\}$ .

38 **Immunity waning and ADE effects:** As we mentioned in the introduction, lots of evi-  
 39 dence suggest that the neutralizing antibodies decay significantly since the onset of symptoms  
 40 of COVID-19 patients, indicating the existence of immunity waning. Given the immunity wan-  
 41 ing, we assume that both the recovered and effectively vaccinated population can temporarily  
 42 immune to COVID-19, and will return back to susceptible classes. In particular, we assume  
 43 that the individuals in  $V_1$  will move to  $S_{V_1\omega}$  due to the waning of immunity, and the population  
 44 in  $R, R_{V_1}, R_{V_2}, V_2$  will move to  $S_{V_2\omega}$ . Correspondingly, the rate of immunity waning are denoted  
 45 by  $\omega_i, i \in \{R, R_{V_1}, R_{V_2}, V_1, V_2\}$ . On the other hand, as the decay of the neutralizing antibodies,  
 46 the binding antibodies can dominant the immune response, which will enhance the infectivity  
 47 of the virus (i.e. ADE effects). That is, compared with other susceptible population, the sus-  
 48 ceptibility of  $S_{V_1\omega}$  and  $S_{V_2\omega}$  is much higher as the pre-existing of immunity. Here, we denote  $\kappa$   
 49 as the modification factor of the susceptibility of the individuals who have lost their immunity.

50 Based on the above assumptions, the model equations can be written as:

$$\begin{aligned}
\frac{dS}{dt} &= -\beta S \frac{I+I_{V_1}+I_{V_2}+\theta(A+A_{V_1}+A_{V_2})}{N} - v_1 S, \\
\frac{dE}{dt} &= \beta S \frac{I+I_{V_1}+I_{V_2}+\theta(A+A_{V_1}+A_{V_2})}{N} - \sigma E, \\
\frac{dI}{dt} &= \rho \sigma E - \gamma I - \delta_I I, \\
\frac{dA}{dt} &= (1-\rho)\sigma E - \gamma_A A, \\
\frac{dH}{dt} &= \delta_I I - \gamma_H H - \alpha H, \\
\frac{dR}{dt} &= \gamma_A A + \gamma I + \gamma_H H - \omega_R R, \\
\frac{dV_1}{dt} &= p_1 v_1 S - v_2 V_1 - \omega_{V_1} V_1, \\
\frac{dV_2}{dt} &= v_2 V_1 + p_2 v_2 S_{V_1} + p_3 v_2 S_{V_{1\omega}} - \omega_{V_2} V_2, \\
\frac{dS_{V_{1\omega}}}{dt} &= \omega_{V_1} V_1 - \kappa \beta S_{V_{1\omega}} \frac{I+I_{V_1}+I_{V_2}+\theta(A+A_{V_1}+A_{V_2})}{N} - v_2 S_{V_{1\omega}}, \\
\frac{dS_{V_{2\omega}}}{dt} &= -\kappa \beta S_{V_{2\omega}} \frac{I+I_{V_1}+I_{V_2}+\theta(A+A_{V_1}+A_{V_2})}{N} + \omega_{R_{V_1}} R_{V_1} + \omega_{R_{V_2}} R_{V_2} + \omega_R R + \omega_{V_2} V_2, \\
\frac{dS_{V_1}}{dt} &= (1-p_1)v_1 S - \beta S_{V_1} \frac{I+I_{V_1}+I_{V_2}+\theta(A+A_{V_1}+A_{V_2})}{N} - v_2 S_{V_1}, \\
\frac{dE_{V_1}}{dt} &= (\kappa \beta S_{V_{1\omega}} + \beta S_{V_1}) \frac{I+I_{V_1}+I_{V_2}+\theta(A+A_{V_1}+A_{V_2})}{N} - \sigma E_{V_1}, \\
\frac{dI_{V_1}}{dt} &= \rho \sigma E_{V_1} - \gamma I_{V_1} - \delta_I I_{V_1}, \\
\frac{dA_{V_1}}{dt} &= (1-\rho)\sigma E_{V_1} - \gamma_A A_{V_1}, \\
\frac{dH_{V_1}}{dt} &= \delta_I I_{V_1} - \gamma_H H_{V_1} - \alpha H_{V_1}, \\
\frac{dR_{V_1}}{dt} &= \gamma_A A_{V_1} + \gamma I_{V_1} + \gamma_H H_{V_1} - \omega_{R_{V_1}} R_{V_1}, \\
\frac{dS_{V_2}}{dt} &= (1-p_2)v_2 S_{V_1} + (1-p_3)v_2 S_{V_{1\omega}} - \beta S_{V_2} \frac{I+I_{V_1}+I_{V_2}+\theta(A+A_{V_1}+A_{V_2})}{N}, \\
\frac{dE_{V_2}}{dt} &= (\kappa \beta S_{V_{2\omega}} + \beta S_{V_2}) \frac{(I+I_{V_1}+I_{V_2}+\theta(A+A_{V_1}+A_{V_2}))}{N} - \sigma E_{V_2}, \\
\frac{dI_{V_2}}{dt} &= \rho \sigma E_{V_2} - \gamma I_{V_2} - \delta_I I_{V_2}, \\
\frac{dA_{V_2}}{dt} &= (1-\rho)\sigma E_{V_2} - \gamma_A A_{V_2}, \\
\frac{dH_{V_2}}{dt} &= \delta_I I_{V_2} - \gamma_H H_{V_2} - \alpha H_{V_2}, \\
\frac{dR_{V_2}}{dt} &= \gamma_A A_{V_2} + \gamma I_{V_2} + \gamma_H H_{V_2} - \omega_{R_{V_2}} R_{V_2}.
\end{aligned} \tag{S1}$$

51 Here,  $N$  is the whole population in the considered region. The equations for  $S, E, I, A, H, R$  rep-  
52 resent the infection and transmission dynamic in the non-vaccinated population, the equations  
53 for  $S_{V_1}, E_{V_1}, I_{V_1}, A_{V_1}, H_{V_1}, R_{V_1}$  represent the infection and transmission dynamic in the population  
54 vaccinated with the first dose vaccine, the equations for  $S_{V_2}, E_{V_2}, I_{V_2}, A_{V_2}, H_{V_2}, R_{V_2}$  represent the  
55 infection and transmission dynamic in the population vaccinated with two doses vaccine.  $V_1$  and  
56  $V_2$  are the population effectively protected by the first dose and two doses vaccine, respectively,  
57 who would not evolve in the transmission dynamic but will lose the immunity with rate  $\omega_{V_1}$  and  
58  $\omega_{V_2}$ , respectively.  $S_{V_{1\omega}}, S_{V_{2\omega}}$  are the population lost the immunity and are more susceptible to

59 the infection due to ADE effect. The detailed definitions of all the parameters are listed in Table  
60 1.

Using the next generation matrix method, we can firstly calculate the basic reproduction number [5]. Then substituting the time-varying parameters and variables into the basic reproduction number, we can obtain the effective reproduction number of model (S1), which is given by

$$R_t = R(t) = \beta \left( \frac{\rho}{\delta_I + \gamma_I} + \frac{\theta(1-\rho)}{\gamma_A} \right) \frac{S(t) + S_{v_1}(t) + S_{v_2}(t) + \kappa S_{v_{1\omega}}(t) + \kappa S_{v_{2\omega}}(t)}{N(t)}. \quad (\text{S2})$$

## 61 S2. Data

62 We obtained the data of the COVID-19 epidemic, and the data of the mass vaccination  
63 program in mainland China from the National Health Commission of the People's Republic  
64 of China [6] and Our World in Data [7], which include the number of daily confirmed cases  
65 and deaths from January 23, 2020 to April 8, 2020 (Fig. S1 (a) and S1 (b)), the cumulative  
66 vaccine doses administered and the daily vaccine doses administered from December 15, 2020  
67 to June 29, 2021 (Fig. S1 (c) and S1 (d)). It should be mentioned that the vaccination data is  
68 available from December 15, 2020 with a report of accumulative 1,500,000 doses used in the  
69 population. However, during the period from December 15, 2020 to March 23, 2021, the data  
70 was not released daily, hence is intermittent. Since March 23, 2021, the vaccination data was  
71 reported per day.

## 72 S3. Model calibration

73 To calibrate the model, we firstly use the data of the COVID-19 epidemic from January  
74 23, 2020 to April 8, 2020 in mainland China to estimate the parameters related to transmission  
75 dynamics. As there is no vaccination during this period, the full model can be reduced to a  
76 model without vaccination.

$$\begin{aligned} \frac{dS}{dt} &= -\beta(t)S \frac{I+\theta A}{N}, \\ \frac{dE}{dt} &= \beta(t)S \frac{I+\theta A}{N} - \sigma E, \\ \frac{dI}{dt} &= \rho \sigma E - \delta_I(t)I - \gamma_I I, \\ \frac{dA}{dt} &= (1-\rho)\sigma E - \gamma_A A, \\ \frac{dH}{dt} &= \delta_I(t)I - \gamma_H H - \alpha H, \\ \frac{dR}{dt} &= \gamma_I I + \gamma_A A + \gamma_H H. \end{aligned} \quad (\text{S3})$$

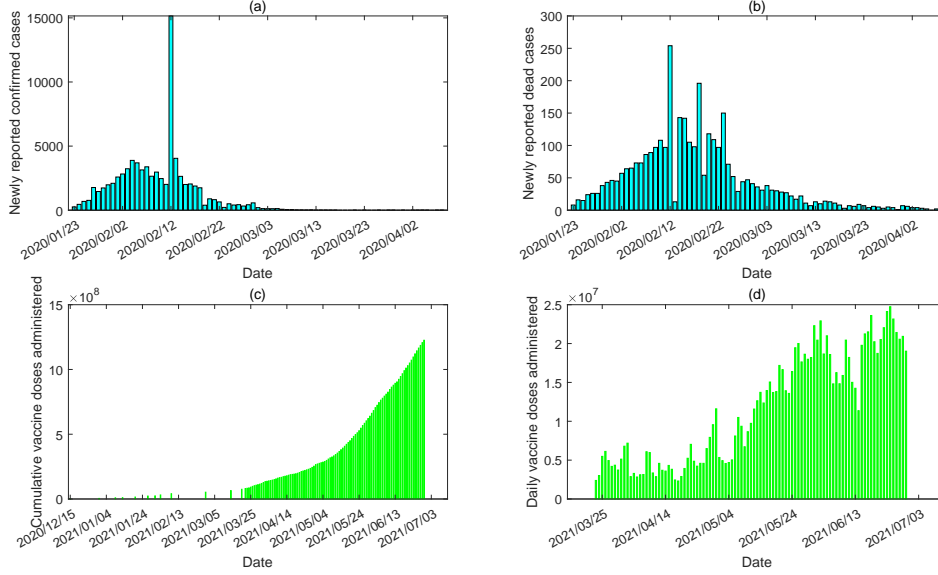

Figure S1: The epidemic data of COVID-19 in mainland China from January 23, 2020 to April 8, 2020 ((a)-(b)), and the vaccine doses administered in mainland China from December 15, 2020 to June 29, 2021 ((c)-(d)). (a) Daily reported confirmed cases; (b) Daily reported dead cases; (c) Cumulative vaccine doses administered; (d) Daily vaccine doses administered.

77 Note that, because the epidemic lasted less than four months and only a very small proportion  
 78 of the whole population was infected, we didn't consider the immunity waning in the reduced  
 79 model. Considering the continuously enhanced control interventions implemented by the gov-  
 80 ernment, we introduced a time-dependent transmission rate and diagnose rate. In detail, the  
 81 transmission rate  $\beta$  is set to be a decreasing function of time  $t$  with the following form

$$\beta(t) = (\beta_0 - \beta_1)e^{-r_b t} + \beta_1, \quad (S4)$$

82 where  $\beta_0$  is the initial transmission rate,  $\beta_1$  is the minimum transmission rate, and  $r_b$  is the  
 83 exponential decreasing rate of the transmission rate. Similarly, we set the diagnose rate is a  
 84 increasing function of time  $t$  with the following form

$$\delta_I(t) = (\delta_{I_0} - \delta_{I_1})e^{-r_d t} + \delta_{I_1}. \quad (S5)$$

85 where  $\delta_{I_0}$  is the initial diagnose rate,  $\delta_{I_1}$  is the maximum diagnose rate, and  $r_d$  is the exponential  
 86 increasing rate of the diagnose rate.  $t_0$  corresponds to January 23, 2020.

87 Model (S3) with (S4) and (S5) can be used to describe the transmission dynamic of the

88 COVID-19 epidemics in mainland China in 2020, with the gradually improved and enhanced  
 89 non-pharmaceutic interventions (NPIs), and without vaccination. Therefore, model (S3) can  
 90 be used to fit the epidemic data of COVID-19 epidemic in mainland China in 2020, to obtain  
 91 the values of parameters related to the disease transmission. To this end, we first fixed several  
 92 parameters from the literature and initial values from the database, as listed in Table 1. Given  
 93 the randomness of reported cases, we used a bootstrap method to generate 1000 time series of  
 94 daily confirmed cases and deaths from a Poisson distribution with mean given by the reported  
 95 data, hence we obtained 1000 data set. We then use the least square method to fit the model to  
 96 each data set.

97 The fitting results of the transmission dynamic model (S3) to the epidemic data of mainland  
 98 China in 2020 are shown in Fig. S2, with the best fitting curves marked as black. Based on the  
 99 fitting results, we obtained the estimation of the unknown parameters (listed in Table 1), and  
 100 also the estimated effective reproduction number (Fig. S2(c)).

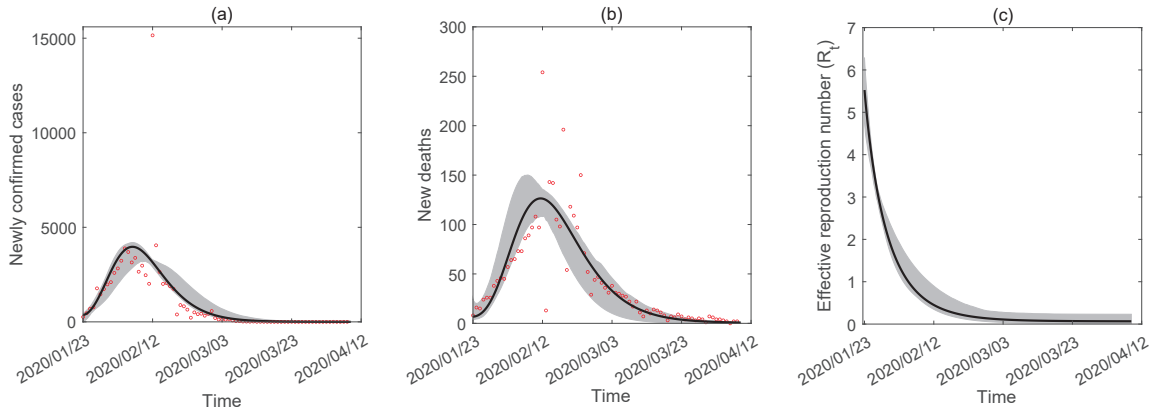

Figure S2: Model fitting results for the transmission dynamic model in mainland China in 2020. (a) The daily reported confirmed cases. (b) The daily reported dead cases. (c) The estimated effective reproduction number. The black curves are the estimated curves with the shadow areas as the corresponding 95% confidence intervals. The red circles in (a) and (b) are the observed data of the daily reported confirmed cases and the daily reported dead case from January 23, 2020 to April 8, 2020 in mainland China.

101 We further used the vaccination data in mainland China from December 15, 2020 to June  
 102 29, 2021 to estimate the parameters related to the mass vaccination program in China. Since  
 103 the initiation of the vaccination program, it has already taken more than 9 months to vacci-  
 104 nate against COVID-19 in mainland China. Therefore, the vaccination program is also a dy-  
 105 namic process. To model the vaccination dynamic without the transmission dynamic, a three-  
 106 compartment model reduced from the full modelling framework (S1) was derived. The three

107 compartments are the population without vaccination ( $S$ ), the population got the first vaccine  
 108 dose ( $S_1$ ) and the population who have received the second vaccine dose ( $S_2$ ), respectively. Then  
 109 the model is given by:

$$\begin{aligned}\frac{dS}{dt} &= -v_1(t)S, \\ \frac{dS_1}{dt} &= v_1(t)S - v_2S_1, \\ \frac{dS_2}{dt} &= v_2S_1.\end{aligned}\tag{S6}$$

110 where  $v_1(t)$  is the time-dependent vaccination rate, as it should be small initially since the  
 111 availability of the number of vaccine doses was limited at the beginning, and then exponentially  
 112 increased as the production of COVID-19 vaccines was accelerated, and finally it could plateau  
 113 to a constant level depending on the daily vaccination capacity. Thus, we assume  $v_1(t)$  as a  
 114 logistic increasing function of time  $t$  with the following form:

$$v_1(t) = \frac{v_0v_b}{v_0 + (v_b - v_0)e^{-rvt}}.\tag{S7}$$

115 with  $t$  corresponds to the time when the initial time is assumed to be December 15, 2020.

116 Considering the initial accessibility of vaccines and the capacity of daily vaccination pop-  
 117 ulation, we set the rate, at which the population receive the first dose, as a logistic function of  
 118 time. In contrast, the rate at which the individuals get the second dose is fixed as a constant.  
 119 Note that the second doses is requested to be vaccinated in 3-8 weeks in China [8], hence we  
 120 set  $v_2 = \frac{1}{35}$ . Based on the vaccination data, the initial time is set as December 15, 2020, and  
 121 the initial conditions are  $S(0) = 1,400,000,000, S_1(0) = 1,500,000, S_2(0) = 0$ . Then, by using  
 122 the similar methods as in fitting the epidemic data, we fitted the vaccination dynamic model to  
 123 1000 vaccination data set.

#### 124 **S4. Immunity waning dynamic model without transmission dynamic**

125 Note that immunity waning makes the people who have gained the immunity after vaccina-  
 126 tion become susceptible again, thus based on model (S1) and incorporating the natural immunity  
 127 waning into model (S6), we can obtain the following system:

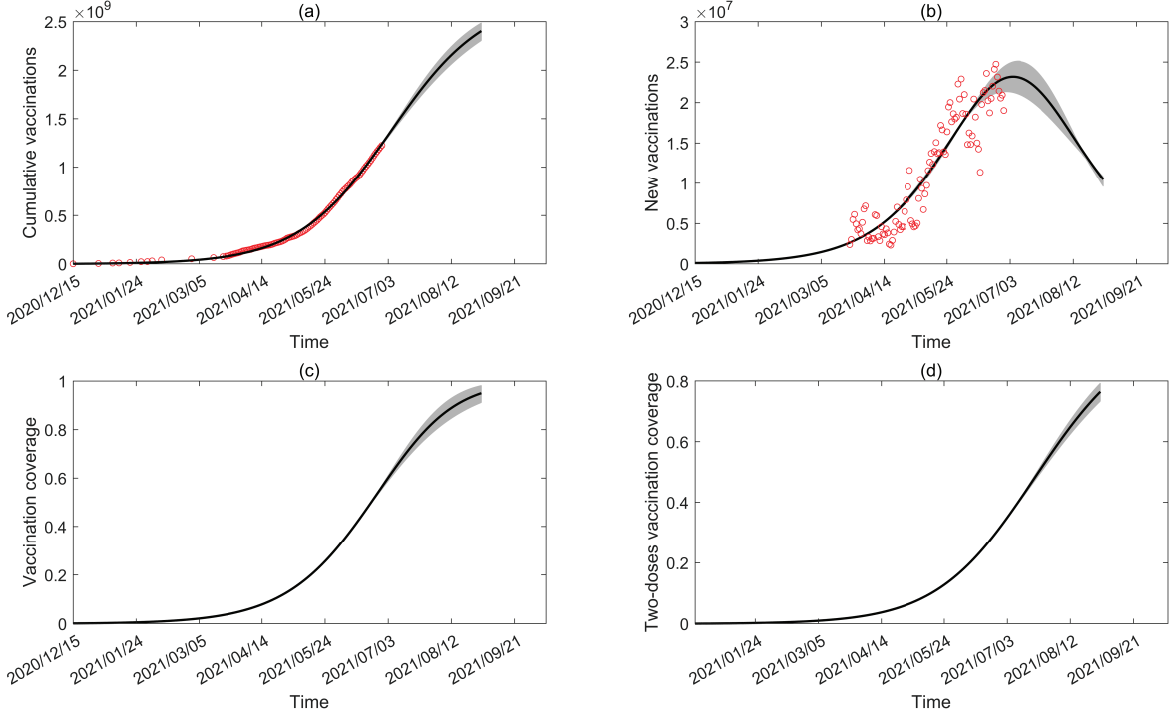

Figure S3: Model fitting results for the vaccination dynamic model. (a) The accumulative number of vaccine doses administered. (2) The daily number of vaccine doses administered. (c) Proportion of population vaccinated with at least one dose. (d) Proportion of population vaccinated with both two doses. The black curves are the estimated curves with the shadow areas as the corresponding 95% confidence intervals. The red circles in (a) and (b) are the reported data of the accumulative vaccine doses and daily vaccine doses administered from December 15, 2020 to June 29, 2021 in mainland China.

$$\begin{aligned}
\frac{dS}{dt} &= -v_1 S, \\
\frac{dV_1}{dt} &= p_1 v_1 S - v_2 V_1 - \omega_{V_1} V_1, \\
\frac{dV_2}{dt} &= v_2 V_1 + p_2 v_2 S_{V_1} + p_3 v_2 S_{V_{1\omega}} - \omega_{V_2} V_2, \\
\frac{dS_{V_{1\omega}}}{dt} &= \omega_{V_1} V_1 - v_2 S_{V_{1\omega}}, \\
\frac{dS_{V_{2\omega}}}{dt} &= \omega_{V_2} V_2, \\
\frac{dS_{V_1}}{dt} &= (1 - p_1) v_1 S - v_2 S_{V_1}, \\
\frac{dS_{V_2}}{dt} &= (1 - p_2) v_2 S_{V_1} + (1 - p_3) v_2 S_{V_{1\omega}}.
\end{aligned} \tag{S8}$$

128 Then, model (S8) combined the vaccination dynamic and the nature immunity waning  
129 dynamic, but without the transmission dynamic of COVID-19. That is, model (S8) can be  
130 used to simulate the vaccination dynamics and the immunity waning dynamic during the pre-  
131 epidemic period.



132 **S5. PRCCs of  $R_s$**

133 By plotting the partial rank correlation coefficients (PRCCs) [21], we conducted a sensi-  
 134 tivity analysis of  $R_s$  with respect to the transmission related parameters ( $\beta, \rho, \delta_I, \theta, \gamma_I, \gamma_A$ ) and  
 135 vaccination related parameters ( $p_1, p_2, p_3, \omega_{V_1}, \omega_{V_2}$ ) and the ADE factor  $\kappa$  over time, as shown  
 136 in Fig. S5 (a). As a results, we found that the transmission rate always have the most significant  
 137 effect and is positive related to  $R_s$ .  $\kappa$  does not dominant before June 13, 2021, which means  
 138 that ADE almost has no effect in the early stage of the vaccination program, mainly due to the  
 139 high effectiveness of the vaccine and majority of the population had not been vaccinated. How-  
 140 ever,  $\kappa$  positively affects the reproduction number significantly after June 13, 2021, attributing  
 141 to the fact that people vaccinated may lose the immunity and has the ADE after a period of  
 142 time. In particular, the PRCCs with respect to the vaccination parameters and the ADE factor  
 143 (Fig. S5)(b) showed that the immunity waning rate  $\omega_{V_1}$  of those received the first dose is also  
 144 positive related to  $R_s$ , which is high in the initial stage of the vaccination program. The PRCC  
 145 of the immunity waning rate  $\omega_{V_2}$  is high in the middle stage of the vaccination program, and the  
 146 PRCC of the efficacy of two-doses  $p_2$  becomes high in the late stage, illustrating the evolution  
 147 of the vaccination and immunity waning dynamics.

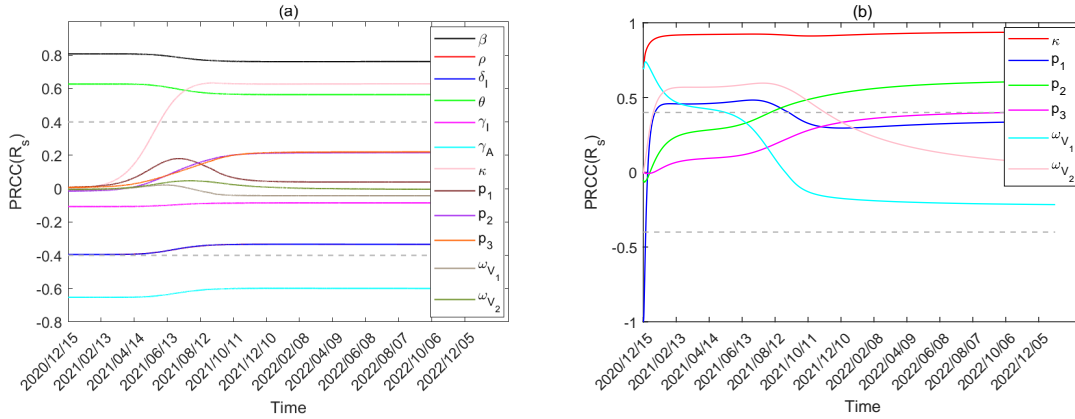

Figure S4: PRCCs of  $R_s$  at different introducing time  $s$  with respect to: (a)  $\beta, \rho, \delta_I, \theta, \gamma_I, \gamma_A, \kappa, p_1, p_2, p_3, \omega_{V_1}, \omega_{V_2}$ ; (b)  $\kappa, p_1, p_2, p_3, \omega_{V_1}, \omega_{V_2}$ . Other parameters are fixed as in Table 1.

148 **S6. Theoretical illustration**

149 We will briefly illustrate that the time length it takes for the number of newly confirmed  
 150 cases reaching  $kI_0$  ( $k \geq 1$ ) is independent of the number of infected cases introduced, by using  
 151 a simple *SEIAHR* model in the following. The total population  $N$  is divided into 6 classes

152  $S, E, I, A, H, R$ , namely,  $N = S + E + I + A + H + R$ . Assume that several infected cases ( $I_0$ ) are  
 153 introduced at time  $s$  in a fully susceptible population, then the system

$$\begin{aligned}
 \frac{dS}{dt} &= -\frac{\beta S(I+\theta A)}{N}, \\
 \frac{dE}{dt} &= \frac{\beta S(I+\theta A)}{N} - \sigma E, \\
 \frac{dI}{dt} &= \rho \sigma E - \delta_I I - \gamma_I I, \\
 \frac{dA}{dt} &= (1 - \rho) \sigma E - \gamma_A A, \\
 \frac{dH}{dt} &= \delta_I I - \gamma_H H - \alpha H, \\
 \frac{dR}{dt} &= \gamma_I I + \gamma_A A + \gamma_H H.
 \end{aligned} \tag{S9}$$

154 has the initial condition  $(S(s), E(s), I(s), A(s), H(s), R(s)) = (S_0, 0, I_0, 0, 0, 0)$  at the initial time  
 155  $s$ , and  $I_0 \ll N_0 = S_0 + I_0$ . Thus it is reasonable to assume  $\frac{S}{N} \approx 1$  in the initial stage of the disease  
 156 transmission. Then by omitting the equation of  $S$  and  $R$ , the model can be reduced to

$$\begin{aligned}
 \frac{dE}{dt} &= \beta(I + \theta A) - \sigma E, \\
 \frac{dI}{dt} &= \rho \sigma E - \delta_I I - \gamma_I I, \\
 \frac{dA}{dt} &= (1 - \rho) \sigma E - \gamma_A A, \\
 \frac{dH}{dt} &= \delta_I I - \gamma_H H - \alpha H,
 \end{aligned} \tag{S10}$$

157 with initial condition  $(E(s), I(s), A(s), H(s)) = (0, I_0, 0, 0)$ . Denote  $e = \frac{E}{I_0}$ ,  $i = \frac{I}{I_0}$ ,  $a = \frac{A}{I_0}$ ,  $h = \frac{H}{I_0}$ ,  
 158 system (S10) is equivalent to the following system

$$\begin{aligned}
 \frac{de}{dt} &= \beta(i + \theta a) - \sigma e, \\
 \frac{di}{dt} &= \rho \sigma e - \delta_I i - \gamma_I i, \\
 \frac{da}{dt} &= (1 - \rho) \sigma e - \gamma_A a, \\
 \frac{dh}{dt} &= \delta_I i - \gamma_H h - \alpha h,
 \end{aligned} \tag{S11}$$

159 with initial value  $(0, 1, 0, 0)$ . Thus the solution of system (S11) is independent of  $I_0$  and is  
 160 unique. Assume that  $t_1$  is the time when the number of newly confirmed cases increases to  $kI_0$   
 161 for the first time, namely,  $\delta_I I(t_1) = kI_0$ , then we have  $i(t_1) = \frac{k}{\delta_I}$ , which is a constant. Thus  $t_1$  as  
 162 well as  $t_1 - s$  is independent of the value of  $I_0$ .

163 [1] B. Tang, X. Wang, Q. Li, N. L. Bragazzi, S. Tang, Y. Xiao, J. Wu, Estimation of the  
 164 transmission risk of the 2019-ncov and its implication for public health interventions,  
 165 Journal of clinical medicine 9 (2) (2020) 462.

166 [2] B. Tang, N. L. Bragazzi, Q. Li, S. Tang, Y. Xiao, J. Wu, An updated estimation of the

- 167 risk of transmission of the novel coronavirus (2019-ncov), *Infectious disease modelling* 5  
168 (2020) 248–255.
- 169 [3] B. Tang, F. Xia, S. Tang, N. L. Bragazzi, Q. Li, X. Sun, J. Liang, Y. Xiao, J. Wu, The  
170 effectiveness of quarantine and isolation determine the trend of the covid-19 epidemics in  
171 the final phase of the current outbreak in china, *International Journal of Infectious Diseases*  
172 95 (2020) 288–293.
- 173 [4] B. Tang, F. Xia, N. L. Bragazzi, Z. McCarthy, X. Wang, S. He, X. Sun, S. Tang, Y. Xi-  
174 ao, J. Wu, Lessons drawn from china and south korea for managing covid-19 epidemic:  
175 Insights from a comparative modeling study, *ISA Transactions* 124 (2022) 164–175.
- 176 [5] P. Van den Driessche, J. Watmough, Reproduction numbers and sub-threshold endemic  
177 equilibria for compartmental models of disease transmission, *Mathematical biosciences*  
178 180 (1-2) (2002) 29–48.
- 179 [6] National Health Commission of the People’s Republic of China, Over 1.82 bln doses  
180 of covid-19 vaccines administered in china, [http://en.nhc.gov.cn/2021-08/13/c\\_84379.htm](http://en.nhc.gov.cn/2021-08/13/c_84379.htm) (2021).  
181
- 182 [7] Our World in Data, Coronavirus (covid-19) vaccination-  
183 s, [https://ourworldindata.org/covid-vaccinations#](https://ourworldindata.org/covid-vaccinations#what-share-of-the-population-has-been-fully-vaccinated-against-covid-19)  
184 [what-share-of-the-population-has-been-fully-vaccinated-against-covid-19](https://ourworldindata.org/covid-vaccinations#what-share-of-the-population-has-been-fully-vaccinated-against-covid-19)  
185 (2021).
- 186 [8] National Health Commission of the People’s Republic of China, Infographic: All you  
187 need to know about taking covid-19 vaccines, [http://en.nhc.gov.cn/2021-04/12/](http://en.nhc.gov.cn/2021-04/12/c_83463.htm)  
188 [c\\_83463.htm](http://en.nhc.gov.cn/2021-04/12/c_83463.htm) (2021).
- 189 [9] National Bureau of Statistics of China, Main data of the seventh national population  
190 census, [http://www.stats.gov.cn/english/PressRelease/202105/t20210510\\_](http://www.stats.gov.cn/english/PressRelease/202105/t20210510_1817185.html)  
191 [1817185.html](http://www.stats.gov.cn/english/PressRelease/202105/t20210510_1817185.html) (2021).
- 192 [10] X. Hao, S. Cheng, D. Wu, T. Wu, X. Lin, C. Wang, Reconstruction of the full transmission  
193 dynamics of covid-19 in wuhan, *Nature* 584 (7821) (2020) 420–424.
- 194 [11] J. A. Backer, D. Klinkenberg, J. Wallinga, Incubation period of 2019 novel coronavirus  
195 (2019-ncov) infections among travellers from wuhan, china, 20-28 january 2020, *Euro-*  
196 *surveillance* 25 (5) (2020) 2000062.

- 197 [12] Q. Li, X. Guan, P. Wu, Early transmission dynamics in wuhan, china, of novel coronavir-  
198 uscinfected pneumonia, *The New England Journal of Medicine* 382 (13) (2020) 1199–  
199 1207.
- 200 [13] Sixth Tone, Chinese-developed covid-19 vaccine over 91% effec-  
201 tive, turkey says, [https://www.sixthtone.com/news/1006620/  
202 chinese-developed-covid-19-vaccine-over-91%25-effective%  
203 2C-turkey-says](https://www.sixthtone.com/news/1006620/chinese-developed-covid-19-vaccine-over-91%25-effective%2C-turkey-says) (2021).
- 204 [14] The University of Melbourne, What are the sinopharm and sinovac vaccines? and  
205 how effective are they? two experts explain, [https://findanexpert.unimelb.  
206 edu.au/news/15054-what-are-the-sinopharm-and-sinovac-vaccines%  
207 3F-and-how-effective-are-they%3F-two-experts-explain](https://findanexpert.unimelb.edu.au/news/15054-what-are-the-sinopharm-and-sinovac-vaccines%3F-and-how-effective-are-they%3F-two-experts-explain) (2021).
- 208 [15] M. D. Tanriover, H. L. Doanay, M. Akova, H. R. Gner, K. Aksu, Efficacy and safety of an  
209 inactivated whole-virion sars-cov-2 vaccine (coronovac): interim results of a double-blind,  
210 randomised, placebo-controlled, phase 3 trial in turkey, *The Lancet* 398 (10296) 213–222.
- 211 [16] N. Ferguson, R. Anderson, S. Gupta, The effect of antibody-dependent enhancement on  
212 the transmission dynamics and persistence of multiple-strain pathogens, *Proceedings of  
213 the National Academy of Sciences* 96 (2) (1999) 790–794.
- 214 [17] D. A. Cummings, I. B. Schwartz, L. Billings, L. B. Shaw, D. S. Burke, Dynamic effects  
215 of antibody-dependent enhancement on the fitness of viruses, *Proceedings of the National  
216 Academy of Sciences* 102 (42) (2005) 15259–15264.
- 217 [18] B. Adams, E. Holmes, C. Zhang, M. Mammen, S. Nimmannitya, S. Kalayanarooj,  
218 M. Boots, Cross-protective immunity can account for the alternating epidemic pattern of  
219 dengue virus serotypes circulating in bangkok, *Proceedings of the National Academy of  
220 Sciences* 103 (38) (2006) 14234–14239.
- 221 [19] H. J. Wearing, P. Rohani, Ecological and immunological determinants of dengue epi-  
222 demics, *Proceedings of the National Academy of Sciences* 103 (31) (2006) 11802–11807.
- 223 [20] M. Recker, K. B. Blyuss, C. P. Simmons, T. T. Hien, B. Wills, J. Farrar, S. Gupta, Immuno-  
224 logical serotype interactions and their effect on the epidemiological pattern of dengue,  
225 *Proceedings of the Royal Society B: Biological Sciences* 276 (1667) (2009) 2541–2548.

226 [21] S. Marino, I. B. Hogue, C. J. Ray, D. E. Kirschner, A methodology for performing glob-  
227 al uncertainty and sensitivity analysis in systems biology, *Journal of theoretical biology*  
228 254 (1) (2008) 178–196.

Table S1: Definitions and values of variables and parameters

| Variables                                                         | Description                                                         | Initial value                                                                 | Resource                |           |
|-------------------------------------------------------------------|---------------------------------------------------------------------|-------------------------------------------------------------------------------|-------------------------|-----------|
| $S$                                                               | Susceptible population                                              | $1.4 \times 10^9$                                                             | [9]                     |           |
| $E$                                                               | Exposed population                                                  | 5926                                                                          | Estimated               |           |
| $I$                                                               | Symptomatic infected population                                     | 3591                                                                          | Estimated               |           |
| $A$                                                               | Asymptomatic infected population                                    | 3459                                                                          | Estimated               |           |
| $H$                                                               | Hospitalized population                                             | 771                                                                           | data                    |           |
| $R$                                                               | Recovered population                                                | 34                                                                            | data                    |           |
| Parameters                                                        | Description                                                         | Value                                                                         | Resource                |           |
| Parameters related to the disease transmission                    |                                                                     |                                                                               |                         |           |
| $\beta(t)$                                                        | $\beta_0$                                                           | Transmission rate in the pre-pandemic era                                     | 2.8749                  | Estimated |
|                                                                   | $\beta_1$                                                           | Minimum transmission rate with control strategies                             | 0.0521                  | Estimated |
|                                                                   | $r_b$                                                               | Exponential decreasing rate of the transmission rate                          | 0.1232                  | Estimated |
| $\theta$                                                          | Relative transmissibility of $A$ to $I$                             | 0.55                                                                          | [10]                    |           |
| $\sigma$                                                          | Progression rate of exposed individuals to infectives               | 1/5.2                                                                         | [11, 12]                |           |
| $\rho$                                                            | Probability of symptomatic                                          | 0.4972                                                                        | Estimated               |           |
| $\delta_I(t)$                                                     | $\delta_{I_0}$                                                      | Initial diagnosis rate of infected individuals                                | 0.1                     | [10]      |
|                                                                   | $\delta_{I_1}$                                                      | Maximum diagnosis rate of infected individuals                                | 0.5848                  | Estimated |
|                                                                   | $r_d$                                                               | Exponential decreasing rate of diagnosis rate from symptom onset to detection | 0.1247                  | Estimated |
| $\gamma_I$                                                        | Recovery rate of symptomatic infectives                             | 1/2.9                                                                         | [10]                    |           |
| $\gamma_A$                                                        | Recovery rate of asymptomatic infectives                            | 1/2.9                                                                         | [10]                    |           |
| $\gamma_H$                                                        | Recovery rate of hospitalized infectives                            | 0.2149                                                                        | Estimated               |           |
| $\alpha$                                                          | Disease induced death rate                                          | 0.0087                                                                        | Estimated               |           |
| Parameters related to the vaccination program and immunity waning |                                                                     |                                                                               |                         |           |
| $v(t)$                                                            | $v_0$                                                               | Initial vaccination rate of the first dose                                    | $5.0437 \times 10^{-5}$ | Estimated |
|                                                                   | $v_1$                                                               | Minimum vaccination rate of the first dose                                    | 0.0585                  | Estimated |
|                                                                   | $r_v$                                                               | Net increasing rate of the vaccination rate of the first dose                 | 0.0338                  | Estimated |
| $v_2$                                                             | Vaccination rate of the second dose                                 | 1/35                                                                          | [8]                     |           |
| $p_1$                                                             | Effective protection rate to $S$ by one-dose vaccine                | 0.3                                                                           | [13–15]                 |           |
| $p_2$                                                             | Effective protection rate to $S_{V_1}$ by two-doses vaccine         | 0.9                                                                           | [13–15]                 |           |
| $p_3$                                                             | Effective protection rate to $S_{V_{1\omega}}$ by two-doses vaccine | 0.9                                                                           | Assumed                 |           |
| $\omega_i$                                                        | Immunity waning rate ( $i = R, R_{V_1}, R_{V_2}, V_1, V_2$ )        | 1/365                                                                         | Assumed                 |           |
| $\kappa$                                                          | Modification factor of susceptibility                               | [1,3]                                                                         | [16–20]                 |           |
